# Supplementary material for: Global link between deformation and volcanic eruption quantified by satellite imagery
Source: PubMed Central journal article supplement (PMC4409635; doi:10.1038/ncomms4471), 2014-04-03
Supplement: ncomms4471-s1.pdf [file ncomms4471-s1.pdf]

**Supplementary Table 1.** Details of individual study regions. The volcano list is taken from the Global Volcanism Programme (GVP) <http://www.volcano.si.edu/index.cfm>, limited to Holocene volcanoes but with submarine and 'unnamed' volcanoes removed. Each volcano is listed only once, even if there are multiple eruptions or deformation episodes. Accounts of eruptions are taken from the GVP database and references are given for observations of deformation. \* Indicates regions used in calculation of 18-year statistics

| Region            | Time period | Number | E&D | E&ND | D&NE | ND&NE | Reference              |
|-------------------|-------------|--------|-----|------|------|-------|------------------------|
| East African Rift | 1997-2011   | 38     | 1   | 0    | 9    | 28    | 1,2.                   |
|                   | 2007-2010   |        | 1   | 0    | 6    | 31    |                        |
| Alaska            | 1992-2010   | 90*    | 15  | 6    | 15   | 54    | 3, 4.                  |
|                   | 2007-2010   |        | 4   | 2    | 20   | 64    |                        |
| Central America   | 2007-2010   | 117    | 4   | 7    | 1    | 105   | 5, 6.                  |
| Northern Andes    | 2007-2010   | 36     | 3   | 2    | 0    | 31    | 7, 8.                  |
| Central Andes     | 1992-2010   | 68*    | 3   | 2    | 5    | 58    | 8,9.                   |
|                   | 2007-2010   |        | 1   | 0    | 7    | 60    | 10                     |
| Southern Andes    | 2007-2010*  | 75     | 2   | 2    | 9    | 62    | 8, 10.                 |
| Indonesia         | 2007-2010   | 76     | 4   | 7    | 2    | 63    | 11, 12.                |
| Galapagos         | 1992-2010   | 13*    | 4   | 0    | 2    | 7     | 13, 14, 15             |
|                   | 2007-2010   |        | 2   | 0    | 4    | 7     |                        |
| Iceland           | 1992-2010   | 27*    | 3   | 1    | 7    | 16    | 16. and refs. therein. |
|                   | 2007-2010   |        | 1   | 1    | 7    | 18    | 17,18                  |
| 18-year           | 1992-2010   | 198    | 25  | 9    | 29   | 135   | PPV=0.46<br>NPV=0.94   |
| 3-year            | 2007-2010   | 540    | 22  | 21   | 56   | 441   | PPV=0.28<br>NPV=0.95   |

**Supplementary Table 2. Volcanoes which both erupted and deformed during observation window.**

Volcanoes with observed deformation that did not erupt in the observation window. The volcano list is taken from the Global Volcanism Programme (GVP) <http://www.volcano.si.edu/index.cfm>, limited to Holocene volcanoes but with submarine and 'unnamed' volcanoes removed. Each volcano is listed only once, even if there are multiple eruptions or deformation episodes. Accounts of eruptions are taken from the GVP database and references are given for observations of deformation. The observation window is 2007-2010, except for where regular and useful observations were possible since 1992. Such volcanoes are marked '\*' and those in the GVP list are included in the calculation of the 18-year statistics. Volcanoes which were observed to deform only during or after eruption are marked '#'.

|    | Volcano                                           | Eruption Date/Style                                          | Deformation Type                                                                 | Deform 2007-2010? | Ref.       |
|----|---------------------------------------------------|--------------------------------------------------------------|----------------------------------------------------------------------------------|-------------------|------------|
| 1  | Gareloi* <sup>#</sup> ,<br>Alaska                 | VEI1 in 1996                                                 | Flow subsidence                                                                  | Yes               | 4          |
| 2  | Kanaga* <sup>#</sup> ,<br>Alaska                  | VEI2 in 1994, 1995.                                          | Flow subsidence                                                                  | Yes               | 4          |
| 3  | Cleveland* <sup>#</sup> ,<br>Alaska               | Numerous VEI2,3.                                             | Flow subsidence                                                                  | Yes               | 3,4        |
| 4  | Santa María <sup>#</sup> , C.<br>America          | Eruption on SW flank<br>(Santiaguito) since 1922             | Flow subsidence                                                                  | Yes               | 42         |
| 5  | Arenal <sup>#</sup> , C.<br>America               | Eruption between 1968-<br>2010(?) VEI 3 at most<br>explosive | Flow subsidence                                                                  | Yes               | 43         |
| 6  | Reventador <sup>#</sup> , N.<br>Andes             | VEI2 in 2001, 2008                                           | Flow subsidence                                                                  | Yes               | 23         |
| 7  | Seguam* <sup>#</sup> ,<br>Alaska                  | VEI2 in 1992, 1993                                           | Episodic uplift and<br>subsidence                                                | Yes               | 44         |
| 8  | Akutan* <sup>#</sup> ,<br>Alaska                  | VEI2 in 1992                                                 | Persistent inflation of<br>0.5-1.0 cm/yr;<br>Shallow intrusion in<br>1996.       | Yes               | 3,4        |
| 9  | Westdahl* <sup>#</sup> ,<br>Alaska                | VEI3 in 1991                                                 | Persistent uplift at 1-<br>5 cm/yr                                               | Yes               | 45         |
| 10 | Fourpeaked* <sup>#</sup> ,<br>Alaska              | VEI2 in 2006                                                 | Episodic uplift                                                                  | Yes               | 4          |
| 11 | Spurr* <sup>#</sup> ,<br>Alaska                   | VEI4 in 1992                                                 | Episodic uplift                                                                  | No                | 4          |
| 12 | Alcedo* <sup>#</sup> ,<br>Galapagos               | VEI1 in 1993                                                 | Subsidence of<br>crystallising magma<br>body and landsliding.                    | Yes               | 14,<br>46  |
| 13 | Sabancaya* <sup>#</sup> ,<br>C. Andes             | 1990-1991, VEI2 in 2000, VEI3<br>in 2002.                    | Deformation 1992-<br>1997 and in 2013,<br>related to<br>earthquakes              | No                | 24         |
| 14 | Nevados de<br>Chillán* <sup>#</sup> ,<br>C. Andes | VEI 1 in 2003                                                | Only deformation<br>from subsidence<br>triggered by Mw8.8<br>2010 earthquake     | Yes               | 8,9,<br>24 |
| 15 | Bárdarbunga* <sup>#</sup> ,<br>Iceland            | Subglacial eruption at Gjalp in<br>1996.                     | Dyke injection, then<br>deflation associated<br>with the 1996 Gjalp<br>eruption. | No                | 25         |
| 16 | Chaitén <sup>#</sup> ,<br>S.Andes                 | VEI4 in 2008                                                 |                                                                                  | Yes               | 47         |
| 17 | Sinabung,<br>Indonesia                            | VEI2 in 2010                                                 | Constant uplift at 2.7<br>cm/yr 2007-2009.                                       | Yes               | 11         |
| 18 | Kerinci,<br>Indonesia                             | VEI in 2007, 2008, 2009<br>ash/gas plumes < 5 km             | Constant uplift at 7.7<br>cm/yr 2007-2009.                                       | Yes               | 11         |

|    |                               |                                                                |                                                                                                                     |     |                 |
|----|-------------------------------|----------------------------------------------------------------|---------------------------------------------------------------------------------------------------------------------|-----|-----------------|
| 19 | Krakatau,<br>Indonesia        | VEI 2 in 2007, 2009, 2010                                      | 4 cm of uplift for 3 months before eruption; intrusion 4 m-wide dyke after eruption                                 | Yes | 48              |
| 20 | Slamet,<br>Indonesia          | VEI2 in 2010; explosive eruptions                              | Constant uplift at 6.8 cm/yr 2007-2009.                                                                             | Yes | 11              |
| 21 | Atka*,<br>Alaska              | VEI1 in 1995                                                   | Episodic inflation                                                                                                  | Yes | 4               |
| 22 | Korovin*,<br>Alaska           | VEI3 in 1998, VEI1 in 2002,2004,2005,2006                      | Reports coverage but no deformation                                                                                 | No  | 3               |
| 23 | Amukta*,<br>Alaska            | VEI1 in 1996, 1997                                             | Subsidence due to contraction of lava flows and/or cooling/degassing of magma                                       | Yes | 4               |
| 24 | Okmok*,<br>Alaska             | VEI3 in 1997, VEI4 in 2008                                     | Persistent uplift at variable rate (a few cm/yr to ~20 cm/yr)                                                       | Yes | 49              |
| 25 | Makushin*,<br>Alaska          | VEI1 in 1993,1995                                              | Episodic uplift and long-term subsidence due to magma intrusion and cooling/degassing                               | Yes | 3               |
| 26 | Veniaminof*,<br>Alaska        | VEI2 in 1993, 2004, 2005; VEI1 in 1995,2002, 2005, 2006, 2008. | Steady uplift at a few cm/yr                                                                                        | Yes | 4,<br>50        |
| 27 | Augustine*,<br>Alaska         | VEI3 in 2005                                                   | Slow uplift, pre-eruptive inflation and co-eruptive deflation                                                       | Yes | 4,<br>51        |
| 28 | Colima,<br>Mexico             | VEI1 in 1994, VEI3 in 2007-2011                                | Constant subsidence > 1 cm/year                                                                                     | Yes | 21              |
| 29 | Masaya,<br>C. America         | Persistent lava lake, VEI 1 in 2008 ash/ phreatomagmatic       | Slow subsidence at ~2 cm/year along ring fault.                                                                     | Yes | 5               |
| 30 | Fernandina*,<br>Galapagos     | VEI2 in 1995, 2005, 2009.                                      | Inflation of radial dyke in 1995; post-eruptive uplift (0.1m) associated with refilling shallow chamber (1998-1999) | Yes | 52.             |
| 31 | Sierra Negra*,<br>Galapagos   | VEI3 in 2005                                                   | Uplift associated with inflation of shallow sill, 2002-2005.                                                        | Yes | 15,<br>53       |
| 32 | Cerro Azul*,<br>Galapagos     | VEI1 in 1998, 2008                                             | pre-eruptive uplift (1992 -1997), post-eruptive subsidence (1998).                                                  | Yes | 13,<br>14       |
| 33 | Láscar*,<br>C.Andes           | 11 eruptions VEI 1-4 since 1993                                | Lava dome deformation; Subsidence pyroclastic flow 1993;                                                            | Yes | 9,5<br>4,5<br>5 |
| 34 | Llaima,<br>S. Andes           | VEI2 in 1994, 1995, 1998, 2003, 2007<br>VEI3 in 2008           | Co/post-eruptive in 2008                                                                                            | Yes | 56              |
| 35 | Eyjafjallajökull*,<br>Iceland | VEI4 in 2010                                                   | Non-eruptive uplift in 1994, 1999. Uplift                                                                           | Yes | 57              |

|    |                                   |                                  |                                                                                   |     |    |
|----|-----------------------------------|----------------------------------|-----------------------------------------------------------------------------------|-----|----|
|    |                                   |                                  | prior to 2010 eruption.                                                           |     |    |
| 36 | Hekla*,<br>Iceland                | VEI3 in 2000                     | Long-term inflation (5mm/yr) and co-eruptive deflation of deep source (14-20 km). | Yes | 37 |
| 37 | Oi Doinyo<br>Lengai,<br>E. Africa | Continuous VEI1<br>VEI 3 in 2007 | Intrusion of a 4 km long dyke followed by deflation of a shallow source.          | Yes | 58 |
| 38 | Galeras,<br>N. Andes              | VEI 1 in 2008                    | 3cm subsidence on northeast flank during 2008 eruption.                           | Yes | 7  |
| 39 | Tungurahua,<br>N. Andes           | VEI3 1999-                       | 20 cm uplift on western flank during 2008 eruption                                | Yes | 59 |

**Supplementary Table 3.** Volcanoes with observed deformation that did not erupt in the observation window. The volcano list is taken from the Global Volcanism Programme (GVP) <http://www.volcano.si.edu/index.cfm>, limited to Holocene volcanoes but with submarine and 'unnamed' volcanoes removed. Each volcano is listed only once, even if there are multiple eruptions or deformation episodes. Accounts of eruptions are taken from the GVP database and references are given for observations of deformation. The observation window is 2007-2010, except for where regular and useful observations were possible since 1992. Such volcanoes are marked "\*" and those in the GVP list are included in the calculation of the 18-year statistics.

|    | Volcano                           | Deformation                         | Proposed mechanism            | Deforming 2007-2010 | Ref. |
|----|-----------------------------------|-------------------------------------|-------------------------------|---------------------|------|
| 1  | Michoacán-Guan., C. America       | Subsidence of recent deposits       | Subsidence of recent deposits | Yes                 | 8    |
| 2  | Lonquimay, S. Andes               | Subsidence of recent deposits       | Subsidence of recent deposits | Yes                 | 8    |
| 3  | Novarupta, Alaska                 | Subsidence of recent deposits       | Subsidence of recent deposits | Yes                 | 4    |
| 6  | Hertali, (aka Haledebi) E. Africa | Variable uplift/subsidence          | Shallow magma/hydro           | Yes                 | 2    |
| 7  | Bora-Bericcio, E. Africa          | Variable uplift/subsidence          | Shallow magma/hydro           | Yes                 | 2    |
| 8  | Alutu, E. Africa                  | Pulses of uplift + slow subsidence  | Shallow magma/hydro           | Yes                 | 2    |
| 9  | Corbetti Caldera, E. Africa       | Pulses of uplift (1997-2000; 2010-) | Shallow magma/hydro           | Yes                 | 2    |
| 10 | Silali, E. Africa                 | Slow subsidence                     | Shallow magma/hydro           | Yes                 | 26   |
| 11 | Paka, E. Africa                   | Uplift pulse (2007-8)               | Shallow magma/hydro           | Yes                 | 1    |
| 12 | Menengai, E. Africa               | Subsidence pulse (1997-2000)        | Shallow magma/hydro           | No                  | 1    |
| 13 | Longonot, E. Africa               | Uplift pulse (2004-6)               | shallow magma/hydro           | No                  | 1    |
| 14 | Suswa, E. Africa                  | Subsidence pulse (1997-2000)        | shallow magma/hydro           | No                  | 1    |
| 15 | Lawu, Indonesia                   | Variable uplift                     | shallow magmatic              | Yes                 | 11   |
| 16 | Lamongan, Indonesia               | Pulse of uplift 2007                | shallow magmatic intrusion    | Yes                 | 11   |
| 17 | Kiska*, Alaska                    | Episodic subsidence and uplift      | hydrothermal                  | Yes                 | 27   |
| 18 | Semisopochnoi*, Alaska            | Persistent subsidence               | cooling of magma/hydro        | Yes                 | 4    |
| 19 | Tanaga*, Alaska                   | Episodic inflation (none 2007-2010) | magmatic intrusion            | No                  | 4    |
| 20 | Fisher*, Alaska                   | Persistent subsidence               | cooling of magma/hydro        | Yes                 | 3    |
| 21 | Kupreanof*, Alaska                | Episodic inflation                  | magmatic intrusion            | Yes                 | 4    |
| 22 | Aniakchak*, Alaska                | Constant subsidence                 | cooling of magma/hydro        | Yes                 | 28   |
| 23 | Ugashik-Peulik*, Alaska           | Uplift pulse 1996-1998              | shallow intrusion             | No                  | 29   |
| 24 | Trident*, Alaska                  | Uplift                              | shallow magma/hydro           | No                  | 30   |
| 25 | Recheschnoi*, Alaska              | Surface uplift (a few cm/yr)        |                               | Yes                 | 4    |
| 26 | Emmons Lake*, Alaska              | surface subsidence (1               | cooling of magma/hydro        | Yes                 | 4    |

|    |                                                            | cm/yr)                                                |                                                                         |     |              |
|----|------------------------------------------------------------|-------------------------------------------------------|-------------------------------------------------------------------------|-----|--------------|
| 27 | Katmai*,<br>Alaska                                         |                                                       | poor coherence                                                          | No  | 4            |
| 28 | Yunaska*,<br>Alaska                                        | Subsidence                                            | contraction of surface<br>lava flows                                    | Yes | 4            |
| 29 | Martin*,<br>Alaska                                         | Inflation                                             | magma intrusion                                                         | Yes | 4            |
| 30 | Iliamna*,<br>Alaska                                        | Episodic inflation                                    | magma intrusion                                                         | No  | 4            |
| 31 | Wolf*,<br>Galapagos                                        | Uplift 1992-1997                                      | shallow magma<br>accumulation                                           | Yes | 13,1<br>4    |
| 32 | Darwin*,<br>Galapagos                                      | Uplift 1992-1998                                      | shallow magma<br>accumulation                                           | Yes | 13,1<br>4    |
| 33 | Near Ticsani*,<br>C. Andes                                 | short subsidence pulse<br>2005                        | earthquake swarm<br>induced subsidence                                  | No  | 31           |
| 34 | Putana*,<br>C. Andes                                       | short uplift pulse 2009-<br>2010                      | shallow magma/hydro                                                     | Yes | 10           |
| 35 | Cordón de Puntas<br>Negras*<br>C. Andes<br>Aka Cerro Overo | Constant subs 1992-2003;<br>constant uplift 2003-2010 | draining and refilling of<br>a distributed shallow<br>crustal reservoir | Yes | 10           |
| 36 | Lastarria*,<br>C. Andes                                    | Variable inflation )~1<br>cm/yr) (started in ~2001)   | hydrothermal                                                            | Yes | 32,3<br>3    |
| 37 | Robledo*, C. Andes<br>(aka Cerro Blanco)                   | 20 years Persistent<br>Subsidence ~1 cm/yr            | hydrothermal                                                            | Yes | 9,<br>10     |
| 38 | Caldera del Atuel,<br>S. Andes                             | subsidence                                            | triggered by Mw8.8<br>2010 earthquake<br>(geothermal?)                  | Yes | 24           |
| 39 | Calabozos,<br>S. Andes                                     | subsidence                                            | triggered by Mw8.8<br>2010 earthquake<br>(geothermal?)                  | Yes | 24           |
| 40 | Cerro Azul,<br>S. Andes                                    | subsidence                                            | triggered by Mw8.8<br>2010 earthquake<br>(geothermal?)                  | Yes | 24           |
| 41 | Laguna del Maule, S.<br>Andes                              | Variable uplift                                       | Shallow magma/hydro                                                     | Yes | 8            |
| 42 | Puyehue-Cordón<br>Caulle, S. Andes                         | Variable uplift                                       | Combined<br>magma/hydro                                                 | Yes | 8            |
| 43 | Cerro Hudson,<br>S. Andes                                  | Uplift at gradually<br>decaying rate.                 | Refilling shallow<br>magma chamber                                      | Yes | 8            |
| 44 | Tinguiririca.,<br>S. Andes                                 | Subsidence                                            | triggered by Mw8.8<br>2010 earthquake                                   | Yes | 24           |
| 45 | Copahue, S. Andes                                          | subsidence                                            |                                                                         | Yes | 34           |
| 46 | Krísuvík*,<br>Iceland                                      | Pulses of uplift and<br>subsidence                    | Combined<br>magma/hydro                                                 | Yes | 35           |
| 47 | Hengill*,<br>Iceland                                       | Uplift 1994-1998                                      | Magma intrusion                                                         | No  | 17,3<br>6    |
| 48 | Torfajökull*,<br>Iceland                                   | Constant subsidence                                   | Cooling magma body                                                      | Yes | 37           |
| 49 | Kverkfjöll*, Iceland                                       | Uplift 2007-2008                                      | Deep dyke intrusion                                                     | Yes | 38           |
| 50 | Askja*,<br>Iceland                                         | Constant subsidence                                   | Cooling magma body.                                                     | Yes | 39           |
| 51 | Krafla*,<br>Iceland                                        | Constant subsidence and<br>wide uplift                | Shallow cooling, deep<br>refilling                                      | Yes | 18,4<br>0,41 |
| 52 | Theistareykjar*, Iceland                                   | Uplift                                                | Magma intrusion                                                         | Yes | 18,4<br>1    |

**Supplementary Table 4.** Volcanoes that erupted during the observation window but at which no deformation has been observed. The volcano list is taken from the Global Volcanism Programme (GVP) <http://www.volcano.si.edu/index.cfm>, limited to Holocene volcanoes but with submarine and 'unnamed' volcanoes removed. Each volcano is listed only once, even if there are multiple eruptions or deformation episodes. Accounts of eruptions are taken from the GVP database and references are given for observations of deformation. The observation window is 2007-2010, except for where regular and useful observations were possible since 1992. Such volcanoes are marked '\*' and those in the GVP list are included in the calculation of the 18-year statistics.

|    | Volcano                    | Eruption                                                                      | Data Coverage                                    | Ref. |
|----|----------------------------|-------------------------------------------------------------------------------|--------------------------------------------------|------|
| 1  | Barren Island, Indonesia   | VEI2 in 2008 and 2010.                                                        | beyond coverage of systematic survey             | 11   |
| 2  | Dempo, Indonesia           | VEI1 in 2009                                                                  | limited data coverage                            | 11   |
| 3  | Dieng Complex, Indonesia   | VEI1 in 2009                                                                  | limited data coverage                            | 11   |
| 4  | Merapi, Indonesia          | VEI4 in 2010                                                                  | Reports coverage but no deformation              | 11   |
| 5  | Kelut, Indonesia           | Dome extrusion 2007-2008,                                                     | Reports coverage but no deformation              | 12   |
| 6  | Semeru, Indonesia          | Continuing eruption since 1967.                                               | Deformation observed with tilt.                  | 19   |
| 7  | Raung, Indonesia           | Ash plumes in 2007-2008,                                                      | Reports coverage but no deformation              | 12   |
| 8  | Kasatochi*, Alaska         | VEI4 in 2008                                                                  | too small to study                               | 4    |
| 9  | Shishaldin*, Alaska        | VEI3 in 1999                                                                  | Reports coverage but no deformation              | 20   |
| 10 | Pavlof*, Alaska            | VEI2 in 1996, 2007                                                            | Reports coverage but no deformation              | 3    |
| 11 | Chiginagak*, Alaska        | VEI1 in 1998                                                                  | Reports coverage but no deformation              | 4    |
| 12 | Wrangell*, Alaska          | VEI1 in 1999, 2002                                                            | poor coherence                                   | 4    |
| 13 | Popocatepetl, C. America   | Continuous cycles of dome forming and collapse.                               | Reports coverage but no deformation              | 21   |
| 14 | Pacaya, C. America         | Strombolian activity 1995-6. Lava flows at MacKenney Crater 2004-2010         | Reports coverage but no deformation              | 22   |
| 15 | San Cristóbal, C. America  | VEI 1 in 11/2007, 06/2007, 2008; VEI 2 in 2009. Ash plumes $\leq 9$ km.       | ALOS 2007-2010, no permanent def. $> 2.7$ cm/yr. | 5    |
| 16 | Telica, C. America         | VEI 1 in 10/2008, 07/2008. Phreatic explosions, ash plumes ( $\leq 2$ km),    | ALOS 2007-2010, no permanent def. $> 1.8$ cm/yr. | 5    |
| 17 | Concepción, C. America     | VEI 1 in 2007, 2008, VEI 2 in 2007. Explosions, gas/ash plumes ( $\leq 1$ km) | poor L-band coherence                            | 5    |
| 18 | Poás, C. America           | VEI 1 in 2008, 01/2009, 11/2009. Phreatic explosions, fumarolic activity.     | ALOS 2007-2010. no permanent def. $> 0.9$ cm/yr. | 5    |
| 19 | Turrialba, C. America      | VEI 2 in 2010 with inc. seismicity/gas                                        | poor L-band coherence                            | 5    |
| 20 | Nevado del Huila, N. Andes | VEI 2 in 2008; VEI 3 in 2007, 2008-2011.                                      | ALOS 2007-2010. No def. until 2008.              | 7    |
| 21 | Guagua Pichincha,          | 2009 phreatic explosions                                                      | 2007-2009 ALOS. no deformation                   | 23   |

|    |                                   |                          |                                                    |    |
|----|-----------------------------------|--------------------------|----------------------------------------------------|----|
|    | N. Andes                          |                          |                                                    |    |
| 22 | Ubinas*,<br>C. Andes              | VEI2 in 2006-2009        | Coverage up to 2004, but none<br>spanning eruption | 9  |
| 23 | Irruputuncu*,<br>C. Andes         | VEI 2 in 1995            | Reports coverage but no<br>deformation             | 9  |
| 24 | Planchón-<br>Peteroa,<br>S. Andes | VEI 2 in 2010            | Reports coverage but no<br>deformation             | 24 |
| 25 | Villarrica,<br>S. Andes           | 2003-2007.               | Reports coverage but no<br>deformation             | 8  |
| 26 | Grimsvötn*,<br>Iceland            | VEI3 in 1996,1998, 2004, | observations prevented by<br>icecap.               | 25 |
| 27 | Redoubt*, Alaska                  | VEI3 in 2009             | GPS observations of<br>deformation, but no InSAR   | 4  |



**Supplementary Table 5. Volcanoes which are categorized as ND & NE.** The volcano list is taken from the Global Volcanism Programme (GVP) <http://www.volcano.si.edu/index.cfm>, limited to Holocene volcanoes but with submarine and 'unnamed' volcanoes removed. Accounts of eruptions are taken from the GVP database and references are given for observations of deformation.

|                     |           |                                                                                                                                                                                                                                                                                                                                                                                                                                                                                                                                                                                                                                                                                                                                                                                                                                                                                                                                                                                                                                                                                                                                                                                                                                                                                                                                                                                                                      |
|---------------------|-----------|----------------------------------------------------------------------------------------------------------------------------------------------------------------------------------------------------------------------------------------------------------------------------------------------------------------------------------------------------------------------------------------------------------------------------------------------------------------------------------------------------------------------------------------------------------------------------------------------------------------------------------------------------------------------------------------------------------------------------------------------------------------------------------------------------------------------------------------------------------------------------------------------------------------------------------------------------------------------------------------------------------------------------------------------------------------------------------------------------------------------------------------------------------------------------------------------------------------------------------------------------------------------------------------------------------------------------------------------------------------------------------------------------------------------|
| Alaska              | 1992-2010 | Buldir, Segula, Davidof, Little Sitkin, Takawangha, Bobrof, Moffett, Great Sitkin, Koniuji, Sergief, Chagulak, Herbert, Carlisle, Tana, Uliaga, Kagamil, Vsevidof, Isanotski, Roundtop, Amak, Frosty, Dutton, ,Pavlof Sister, Dana, Stepovak Bay 2, Stepovak Bay 3, Stepovak Bay 4, Black Peak, Yantarni, Kialagvik, Ukinrek Maars, Mageik, Griggs, Snowy Mountain, Denison, Steller, Kukak, Kaguyak, Douglas, Hayes, St. Paul Island, Nunivak Island, Ingakslugwat Hills, St. Michael, Kookooligit Mountains, Imuruk Lake, Buzzard Creek, Sanford, Gordon, Churchill, Edgcombe, Duncan Canal, Tlevak Strait-Suemez Is., Behm Canal-Rudyard Bay.                                                                                                                                                                                                                                                                                                                                                                                                                                                                                                                                                                                                                                                                                                                                                                     |
| Alaska              | 2007-2010 | As 1992-2010, plus Shishaldin, Chiginagak, Wrangell, Spurr, Korovin, Iliamna, Tanaga, Uguashik-Peulik, Trident, Katmai                                                                                                                                                                                                                                                                                                                                                                                                                                                                                                                                                                                                                                                                                                                                                                                                                                                                                                                                                                                                                                                                                                                                                                                                                                                                                               |
| C. Andes            | 1992-2010 | Cerro Auquihuato, Sara Sara, Coropuna, Andahua-Orcopampa, Huambo, Nevado Chachani, Cerro Nicholson, El Misti, Huaynaputina, Tutupaca, Yucamane, Nevados Casiri, Tacora, Taapaca, Parinacota, Guallatiri, Tambo Quemado, Isluga, Tata Sabaya, Laguna Jayu Kkota, Nuevo Mundo, Pampa Luxsar, Olca-Paruma, Ollagüe, Cerro del Azufre, San Pedro, Sairecabur, Licancabur, Guayaques, Purico Complex, Colachi, Acamarachi, Chiliques, Cerro Overo, Miñiques, Cerro Tujle, Caichinque, Tilocalar, El Negrillar, Pular, La Negrillar, Socompa, Lullaillaco, Cerro Escorial, Cordón del Azufre, Cerro Bayo, Sierra Nevada, Falso Azufre, Nevado de Incahuasi, El Solo, Copiapó, Cerro Tuzgle, Antofagasta de la Sierra, Cerro del Cóndor, Peinado, Tipas, Ojos del Salado                                                                                                                                                                                                                                                                                                                                                                                                                                                                                                                                                                                                                                                    |
| C. Andes            | 2007-2010 | As 1992-2010, plus Sabancaya, 'Near Ticsani', Irruputuncu                                                                                                                                                                                                                                                                                                                                                                                                                                                                                                                                                                                                                                                                                                                                                                                                                                                                                                                                                                                                                                                                                                                                                                                                                                                                                                                                                            |
| Iceland             | 1992-2010 | Snaefellsjökull, Helgrindur, Ljósufjöll, Reykjanes, Brennisteinsfjöll, Hrómundartindur, Grímsnes, Prestahnukur, Hveravellir, Hofsjökull, Tindfjallajökull, Tungnafellsjökull, Fremrinamur, Óraefajökull, Esjufjöll, Jan Mayen.                                                                                                                                                                                                                                                                                                                                                                                                                                                                                                                                                                                                                                                                                                                                                                                                                                                                                                                                                                                                                                                                                                                                                                                       |
| Iceland             | 2007-2010 | Hengill and Bardabunga                                                                                                                                                                                                                                                                                                                                                                                                                                                                                                                                                                                                                                                                                                                                                                                                                                                                                                                                                                                                                                                                                                                                                                                                                                                                                                                                                                                               |
| Galapagos           | 1992-2010 | Ecuador, Pinta, Marchena, Genovesa, Santiago, Santa Cruz, San Cristóbal.                                                                                                                                                                                                                                                                                                                                                                                                                                                                                                                                                                                                                                                                                                                                                                                                                                                                                                                                                                                                                                                                                                                                                                                                                                                                                                                                             |
| E. Africa           | 1997-2010 | Liado Hayk, Dofen, Fentale, Beru, Kone, Boset-Bericha, Bishoftu Volcanic Field, Sodore, Gedamsa, Tullu Moje, East Zway, Butajiri-Silti Field, O'a Caldera, North Island, Central Island, South Island, Marsabit, The Barrier, Namarunu, Segererua Plateau, Emurangogolak, Korosi, Ol Kokwe, Nyambeni Hills, Homa Mountain, Elmenteita Badlands, Ol Doinyo Eburru, Olkaria                                                                                                                                                                                                                                                                                                                                                                                                                                                                                                                                                                                                                                                                                                                                                                                                                                                                                                                                                                                                                                            |
| E. Africa           | 2007-2010 | Menengai, Longonot and Suswa                                                                                                                                                                                                                                                                                                                                                                                                                                                                                                                                                                                                                                                                                                                                                                                                                                                                                                                                                                                                                                                                                                                                                                                                                                                                                                                                                                                         |
| Mexico & C. America | 2007-2010 | Prieto, Cerro, Pinacate, San Quintín Volcanic Field, Isla San Luis, Jaraguay Volcanic Field, Coronado, Guadalupe, San Borja Volcanic Field, Tres Vírgenes, Isla Tortuga, Comondú-La Purísima, Bárcena, Socorro, Durango Volcanic Field, Isla Isabel, Sangangüey, Ceboruco, Mascota Volcanic Field, Zitácuaro-Valle de Bravo, Jocotitlán, Nevado de Toluca, Chichinautzin, Papayo, Iztaccíhuatl, La Malinche, Serdán-Oriental, Los Humeros, Los Atlixcos, Naolinco Volcanic Field, Cofre de Perote, La Gloria, Las Cumbres, Pico de Orizaba, San Martín, El Chichón, Tacaná_Tajumulco, Almolonga, Atitlán, Tolimán, Acatenango, Fuego, Agua, Cuilapa-Barbarena, Tecuamburro, Jumaytepeque, Moyuta, Flores, Tual, Cerro Santiago, Suchitán, Chingo, Ixtepeque, Ipala, Chiquimula Volcanic Field, Quezaltepeque, San Diego, Cerro Singüil, Apaneca Range, Santa Ana, Izalco, Coatepeque Caldera, San Salvador, Cerro Cinotepeque, Guazapa, Ilopango, San Vicente, Apastepeque Field, Taburete, Tecapa, Usulután, El Tigre, Chinameca, San Miguel, Laguna Aramuaca, Conchagua, Conchagüita, Isla el Tigre, Isla Zacate Grande, Lake Yojoa, Utila Island, Cosigüina, Rota, Cerro Negro, Las Pilas, Momotombo, Apoyeque, Nejapa-Miraflores, Granada, Mombacho, Zapatera, Maderas, Estelí, Cerro Ciguatope, Las Lajas, Volcán Azul, Orosí, Rincón de la Vieja, Miravalles, Tenorio, Platanar, Barva, Irazú, Barú, El Valle. |

|           |           |                                                                                                                                                                                                                                                                                                                                                                                                                                                                                                                                                                                                                                                                                                                                                                                                                                        |
|-----------|-----------|----------------------------------------------------------------------------------------------------------------------------------------------------------------------------------------------------------------------------------------------------------------------------------------------------------------------------------------------------------------------------------------------------------------------------------------------------------------------------------------------------------------------------------------------------------------------------------------------------------------------------------------------------------------------------------------------------------------------------------------------------------------------------------------------------------------------------------------|
| N. Andes  | 2007-2010 | Romeral, Cerro Bravo, Nevado del Ruiz, Santa Isabel, Nevado del Tolima, Machín, Puracé, Sotar, Petacas, Doña Juana, Azufral, Cumbal, Cerro Negro de Mayasquer, Soche, Chachimbiro, Cuicocha, Imbabura, Mojanda, Cayambe, Pululagua, Atacazo, Chacana, Aliso, Sumaco, Illiniza, Cotopaxi, Quilotoa, Chimborazo, Licto, Sangay.                                                                                                                                                                                                                                                                                                                                                                                                                                                                                                          |
| S. Andes  | 2007-2010 | Tupungatito, San José, Maipo, Palomo, Risco Plateado, Infiernillo, Grande Descabezado, San Pedro-Pellado, Nevado de Longaví, Blancas, Lomas, Resago, Payún Matru, Domuyo, Cochiquito Volcanic Group, Tromen, Puesto Cortaderas, Antuco, Trocon, Laguna Mariñaqui, Tolguaca, Tralihue, Laguna Blanca, Sollipulli, Caburgua-Huelemolle, Quetrupillan, Lanín, Huanquihue Group, Mocho Choshuenco, Carrán-Los Venados, Cerro Pantoja, Antillanca Group, Puntigudo-Cordón Cenizos, Osorno, Tronador, Cayutué-La Viguera, Calbuco, Cuernos del Diablo, Yate, Hornopirén, Apagado, Crater Basalt Volcanic Field, Huequi, Minchinmávida, Yanteles, Corcovado, Palena Volcanic Group, Melimoyu, Puyuhuapi, Mentolat, Cay, Maca, Río Murta, Arenales, Lautaro, Viedma, Aguilera, Reclus, Monte Burney, Palei-Aike Volcanic Field, Fuego, Aracar. |
| Indonesia | 2007-2010 | Seulawah Agam, Peuet Sague, Bur ni Telong, Sibayak, Toba, Imun, Sibualbuali, Lubukraya, Sorikmarapi, Malintang, Sarik-Gajah, Marapi, Tandikat, Talang, Kunist, Hutapanjang, Sumbing, Pandan, Belirang-Beriti, Bukit Daun, Kaba, Patah, Bukit Lumut Balai, Besar, Ranau, Sekincau Belirang, Suoh, Hulubelu, Rajabasa, Pulosari, Karang, Perbakti-Gagak, Salak, Gede, Patuha, Wayang-Windu, Malabar, Tangkubanparahu, Papandayan, Kendang, Guntur, Tampomas, Galunggung, Talagabodas, Kawah Karaha, Cereme, Sundoro, Sumbing, Ungaran, Telomoyo, Merbabu, Muria, Wilis, Kawi-Butak, Arjuno-Welirang, Penanggungan, Malang Plain, Tengger Caldera, Lurus, Iyang-Argapura, Ijen, Baluran, Talakmau                                                                                                                                         |

**Supplementary Table 6.** Volcanoes with observed deformation that did not erupt in the observation but do not appear in the volcano list and are not included in the statistical analysis. References are given for observations of deformation. The observation window is 2007-2010, except for where regular and useful observations were possible since 1992.

| <b>Volcano</b>           | <b>Observation</b>                               | <b>Location</b>                                    | <b>Deform 2007-2010?</b> | <b>Ref.</b> |
|--------------------------|--------------------------------------------------|----------------------------------------------------|--------------------------|-------------|
| Uturuncu*, C. Andes      | Uplift at 1.1 cm/yr with a moat of subsidence.   | Pleistocene volcano, C. Andes                      | Yes                      | 9,10,60     |
| Lazufre*, C. Andes       | Variable inflation (1-3 cm/year) started in 1998 | Between Lastarria and Lazufre volcanoes, C. Andes. | Yes                      | 9,32,61     |
| Hualca Hualca*, C. Andes | Inflation from 1992-2002                         | Stratovolcano not listed in GVP                    | Yes                      | 9,10        |
| Gelei, E. Africa         | Subsidence during a dyke intrusion episode       | On the flank of a pre-rift volcanic shield         | Yes                      | 62,63,64    |

**Supplementary Table 7:** Volcanoes classified as deforming and erupting from both individual and systematic studies, but excluded from Figure 4.

|                                                 |                                                                                                                                                                                   |
|-------------------------------------------------|-----------------------------------------------------------------------------------------------------------------------------------------------------------------------------------|
| <b>Persistent lava lakes:</b>                   | Erta Ale, Masaya, Nyiragongo                                                                                                                                                      |
| <b>Continuous effusion:</b>                     | Kilauea, Suwanose-jima, Ol Doinyo Lengai,                                                                                                                                         |
| <b>Frequent eruptions:</b>                      | Soufriere Hills (1997-2010), Tungurahua (1999-),<br>Revantador (2002-), Piton La Fournaise, Karymsky,<br>Cleveland, Veniaminof, Lascar, Etna, Nyamuragira,<br>Miyakejima (2000-), |
| <b>&lt;4 years InSAR observations reported:</b> | Slamet, Usu, Bárdarbunga, Sinabung, Kerinci, Ibu,<br>Kirishima, Unzen, Kuju, Anatahan, Tokachi,<br>Bezymianny, Iwo-jima                                                           |

### Supplementary References.

1. Biggs, J., Anthony, E. Y., & Ebinger, C. J. Multiple inflation and deflation events at Kenyan volcanoes, East African Rift. *Geology*, **37**, 979-982 (2009).
2. Biggs, J., Bastow, I. D., Keir, D., & Lewi, E. Pulses of deformation reveal frequently recurring shallow magmatic activity beneath the Main Ethiopian Rift. *Geochemistry, Geophysics, Geosystems*, **12**, Q0AB10 (2011).
3. Lu, Z., *et al* Diverse deformation patterns of Aleutian volcanoes from satellite interferometric synthetic aperture radar (InSAR). *Geophysical Monograph Series*, **172**, 249-261 (2007).
4. Lu, Z. & Dzurisin, D. InSAR Imaging of Aleutian Volcanoes: Monitoring a Volcanic Arc from Space. Springer Praxis, (2014).
5. Ebmeier, S. K., Biggs, J., Mather, T. A., & Amelung, F. On the lack of InSAR observations of magmatic deformation at Central American volcanoes. *Journal of Geophysical Research*, **118**, 2571–2585 (2013).
6. Chaussard, E., Amelung, F., & Aoki, Y. Characterization of open and closed volcanic systems in Indonesia and Mexico using InSAR time series. *Journal of Geophysical Research: Solid Earth*, **118**, 3957-3969 (2013).
7. Parks, M. M., *et al*. Co-eruptive subsidence at Galeras identified during an InSAR survey of Colombian volcanoes (2006–2009). *Journal of Volcanology and Geothermal Research*, **202**, 228-240 (2011).
8. Fournier, T. J., Pritchard, M. E., & Riddick, S. N. Duration, magnitude, and frequency of subaerial volcano deformation events: New results from Latin America using InSAR and a global synthesis. *Geochemistry, Geophysics, Geosystems*, **11**, Q01003 (2010).
9. Pritchard, M. E., & Simons, M. An InSAR- based survey of volcanic deformation in the central Andes. *Geochemistry, Geophysics, Geosystems*, **5**, Q02002 (2004).
10. Henderson, S. T., & Pritchard, M. E. Decadal volcanic deformation in the Central Andes Volcanic Zone revealed by InSAR time series. *Geochemistry, Geophysics, Geosystems* **14**,1358–1374 (2013).
11. Chaussard, E., & Amelung, F. Precursory inflation of shallow magma reservoirs at west Sunda volcanoes detected by InSAR. *Geophysical Research Letters*, **39**, L21311 (2012).
12. Philiposian, B., & Simons, M. A survey of volcanic deformation on Java using ALOS PALSAR interferometric time series. *Geochemistry, Geophysics, Geosystems*, **12** Q11004 (2011).
13. Amelung, F., Jónsson, S., Zebker, H., & Segall, P. Widespread uplift and ‘trapdoor’ faulting on Galapagos volcanoes observed with radar interferometry. *Nature*, **407**, 993-996 (2000).
14. Osmanoglu, B., Baker, S., Bagnardi, M., & Amelung, F. The Galápagos Islands seen from space: the contribution of Synthetic Aperture Radar Interferometry (InSAR) to volcano monitoring. *AGU Fall Meeting Abstracts*, **1**, 2268 (2010).
15. Bagnardi, M., Amelung, F., & Poland, M. P. A new model for the growth of basaltic shields based on deformation of Fernandina volcano, Galápagos Islands. *Earth and Planetary Science Letters*, **377**, 358-366 (2013).
16. Sturkell, E. *et al*. Volcano geodesy and magma dynamics in Iceland. *Journal of Volcanology and Geothermal Research*, **150**, 14-34 (2006).
17. Jonsson, S. Anthropogenic and natural deformation on Reykjanes Peninsula, Southwest Iceland, observed using InSAR time-series analysis 1992-2008. *Geophysical Research Abstracts*, **11**, EGU2009-5142-1 (2009).
18. Spaans, K. H., Sigmundsson, F., Hreinsdóttir, S., & Öfeigsson, B. G. High resolution surface deformation measurements in Iceland's Northern Volcanic Zone: Unraveling multiple deformation sources using InSAR and GPS. *Geophysical Research Abstracts*, **14**, EGU2012-10604 (2012).
19. Iguchi, M., Yakiwara, H., Tameguri, T., Hendrasto, M. & Hirabayashi, J.-I. Mechanism of explosive eruption revealed by geophysical observations at the Sakurajima, Suwanosejima and Semeru volcanoes, *Journal of Volcanology Geothermal Research*, **178**, 1-9 (2008).
20. Moran, S. C., Kwoun, O., Masterlark, T., & Lu, Z. On the absence of InSAR-detected volcano deformation spanning the 1995–1996 and 1999 eruptions of Shishaldin Volcano, Alaska. *Journal of Volcanology and Geothermal Research*, **150**, 119-131 (2006).

21. Pinel, V., *et al.* The challenging retrieval of the displacement field from InSAR data for andesitic stratovolcanoes: Case study of Popocatepetl and Colima volcano, Mexico. *Journal of Volcanology and Geothermal Research*, **200**, 49-61 (2011).
22. Zebker, H. A., Amelung, F. & Jonsson, S. Remote Sensing of Volcano Surface and Internal Processes Using Radar Interferometry, in *Remote Sensing of Active Volcanism* (eds P. J. Mouginiis-Mark, J. A. Crisp and J. H. Fink), American Geophysical Union, Washington, D. C. (2013).
23. Mothes, P., *et al.* Survey of Volcanic Activity in Ecuador using L-band SAR. In *AGU Fall Meeting Abstracts*, **1**, 2055 (2008).
24. Pritchard, M. E., Jay, J.A., Aron, F., Henderson, S.T. & Lara, L. E. Subsidence at southern Andes volcanoes induced by the 2010 Maule, Chile earthquake, *Nature Geoscience*, **6**, 632–636 (2013).
25. Pagli, C. *et al.* Crustal deformation associated with the 1996 Gjalp subglacial eruption, Iceland: InSAR studies in affected areas adjacent to the Vatnajökull ice cap. *Earth and Planetary Science Letters*, **259**, 24-33 (2007).
26. Biggs, J., Robertson, E., & Mace, M. ISMER—Active Magmatic Processes in the East African Rift: A Satellite Radar Perspective. In *Remote Sensing Advances for Earth System Science*, pp. 81-91, Springer Berlin Heidelberg (2013).
27. Lu, Z., Masterlark, T., Power, J., Dzurisin, D., & Wicks, C. Subsidence at Kiska volcano, western Aleutians, detected by satellite radar interferometry. *Geophysical Research Letters*, **29**, 2-1 (2002).
28. Kwoun, O. I., Lu, Z., Neal, C., & Wicks, C. Quiescent deformation of the Aniakchak Caldera, Alaska, mapped by InSAR. *Geology*, **34**, 5-8 (2006).
29. Lu, Z., *et al.* Magmatic inflation at a dormant stratovolcano: 1996–1998 activity at Mount Peulik volcano, Alaska, revealed by satellite radar interferometry. *Journal of Geophysical Research*, **107**, ETG 4-1– ETG 4-13 (2002).
30. Lu, Z., *et al.* Deformation of New Trident Volcano measured by ERS- 1 SAR interferometry, Katmai National Park, Alaska. *Geophysical Research Letters*, **24**, 695-698 (1997).
31. Holtkamp, S. G., Pritchard, M. E., & Lohman, R. B. Earthquake swarms in South America. *Geophysical Journal International*, **187**, 128-146 (2011).
32. Ruch, J. *et al.* Stress transfer in the Lazufre volcanic area, central Andes. *Geophysical Research Letters*, **36**, L22303 (2009).
33. Froger, J. L., Rémy, D., Bonvalot, S., & Legrand, D. Two scales of inflation at Lastarria-Cordon del Azufre volcanic complex, central Andes, revealed from ASAR-ENVISAT interferometric data. *Earth and Planetary Science Letters*, **255**, 148-163 (2007)
34. Velez, M. L., Euillades, P., Caselli, A., Blanco, M., & Díaz, J. M. Deformation of Copahue volcano: Inversion of InSAR data using a genetic algorithm. *Journal of Volcanology and Geothermal Research*, **202**, 117-126 (2011).
35. Michalczywska, K., *et al.* The inflation and deflation episodes in the Krísuvík geothermal area. *AGU Fall Meeting Abstracts* **1**, 2589 (2011).
36. Clifton, A. E., Sigmundsson, F., Feigl, K. L., Guðmundsson, G., & Árnadóttir, T. Surface effects of faulting and deformation resulting from magma accumulation at the Hengill triple junction, SW Iceland, 1994–1998. *Journal of Volcanology and Geothermal Research*, **115**, 233-255 (2002).
37. Ofeigsson, B. G., Hooper, A., Sigmundsson, F., Sturkell, E., & Grapenthin, R. Deep magma storage at Hekla volcano, Iceland, revealed by InSAR time series analysis. *Journal of Geophysical Research*. **116**, B05401 (2011).
38. Hooper, A. *et al.* Increased capture of magma in the crust promoted by ice-cap retreat in Iceland. *Nature Geoscience*, **4**, 783-786 (2011).
39. De Zeeuw-van Dalfsen, E., Pedersen, R., Hooper, A., & Sigmundsson, F. Subsidence of Askja caldera 2000–2009: modelling of deformation processes at an extensional plate boundary, constrained by time series InSAR analysis. *Journal of Volcanology and Geothermal Research*, **213**, 72-82 (2012).
40. De Zeeuw- van Dalfsen, E., Pedersen, R., Sigmundsson, F., & Pagli, C. Satellite radar interferometry 1993–1999 suggests deep accumulation of magma near the crust- mantle boundary at the Krafla volcanic system, Iceland. *Geophysical Research Letters*, **31**, L13611 (2004).

41. Metzger, S., Jónsson, S., & Geirsson, H. Locking depth and slip- rate of the Húsavík Flatey fault, North Iceland, derived from continuous GPS data 2006–2010. *Geophysical Journal International*, **187**, 564-576 (2011).
42. Ebmeier, S. K., *et al.*, Measuring large topographic change with InSAR: Lava thicknesses, extrusion rate and subsidence rate at Santiaguito volcano, Guatemala. *Earth and Planetary Science Letters*, **335**, 216-225 (2012).
43. Ebmeier, S. K., Biggs, J., Mather, T. A., Wadge, G., & Amelung, F. Steady downslope movement on the western flank of Arenal volcano, Costa Rica. *Geochemistry, Geophysics, Geosystems*, **11**, Q12004 (2010).
44. Lee, C-W. Lu, Z., Won, J-S., Jung, H-S, Dzurisin, D., Dynamic deformation of Seguam Island, Alaska, 1992–2008, from multi-interferogram InSAR processing, *Journal of Volcanology and Geothermal Research*, **260**, 43–51 (2013).
45. Lu, Z., *et al.* Aseismic inflation of Westdahl volcano, Alaska, revealed by satellite radar interferometry. *Geophysical Research Letters*, **27**, 1567-1570 (2000).
46. Hooper, A., Segall, P. & Zebker, H., Persistent scatterer interferometric synthetic aperture radar for crustal deformation analysis, with application to Volcán Alcedo, Galápagos, *Journal of Geophysical Research*, **112**, B07407 (2007).
47. Wicks, C., de La Llera, J. C., Lara, L. E., & Lowenstern, J. The role of dyking and fault control in the rapid onset of eruption at Chaitén volcano, Chile. *Nature*, **478**, 374-377 (2011).
48. Agustan, A., Kimata, F., Pamitro, Y. E., & Abidin, H. Z. Ground deformation of Krakatau Volcano, Indonesia, detected by InSAR: June 2007 to February 2009. *AGU Fall Meeting Abstracts*, **1**, 692 (2009).
49. Lu, Z., Dzurisin, D., Biggs, J., Wicks, C., & McNutt, S. Ground surface deformation patterns, magma supply, and magma storage at Okmok volcano, Alaska, from InSAR analysis: 1. Interruption deformation, 1997–2008. *Journal of Geophysical Research*, **115**, (2010).
50. Fournier, T.J., and Freymueller, J.T., Inflation detected at Mount Veniaminof, Alaska, with campaign GPS: *Geophysical Research Letters*, **35**, L20306 (2008).
51. Cervelli, P. *et al.*, The geodetic perspective on the 2006 eruption of Augustine Volcano, U.S. Geological Survey Professional Paper **1769**, 427–452 (2010).
52. Chadwick Jr, W. W., *et al.*, The May 2005 eruption of Fernandina volcano, Galápagos: The first circumferential dike intrusion observed by GPS and InSAR. *Bulletin of volcanology*, **73**, 679-697 (2011).
53. Chadwick, W. W. *et al.* A volcano bursting at the seams: inflation, faulting, and eruption at Sierra Negra Volcano, Galápagos. *Geology*, **34**, 1025-1028 (2006).
54. Pavez, A. *et al.* Insight into ground deformations at Lascar volcano (Chile) from SAR interferometry, photogrammetry and GPS data: Implications on volcano dynamics and future space monitoring. *Remote Sensing of Environment*, **100**, 307-320 (2006).
55. Whelley, P. L. *et al.* Post-depositional fracturing and subsidence of pumice flow deposits: Lascar volcano, Chile, *Bulletin of Volcanology*, **74**, 511-531 (2011).
56. Bathke, H., Shirzaei, M., & Walter, T. R. Inflation and deflation at the steep- sided Llaima stratovolcano (Chile) detected by using InSAR. *Geophysical Research Letters*, **38** L10304 (2011).
57. Sigmundsson, F. *et al.*, Intrusion triggering of the 2010 Eyjafjallajökull explosive eruption. *Nature*, **468**, 426-430 (2010).
58. Biggs, J., Chivers, M. & Hutchinson, M, Surface deformation and stress interactions during the 2007-2010 sequence of earthquake, dyke intrusion and eruption in Northern Tanzania. *Geophysical Journal International*, **195**, 16-26 (2013).
59. Biggs, J. *et al.* Stratovolcano growth by co- eruptive intrusion: the 2008 eruption of Tungurahua, Ecuador. *Geophysical Research Letters*, **37**, L21302 (2010).
60. Fialko, Y., & Pearce, J. Sombrero uplift above the Altiplano-Puna magma body: evidence of a ballooning mid-crustal diapir. *Science*, **338**, 250-252 (2012)
61. Ruch, J., & Walter, T. R. Relationship between the InSAR-measured uplift, the structural framework, and the present-day stress field at Lazufre volcanic area, central Andes. *Tectonophysics*, **492**, 133-140 (2010).
62. Baer, G., Hamiel, Y., Shamir, G., & Nof, R. Evolution of a magma-driven earthquake swarm and triggering of the nearby Oldoinyo Lengai eruption, as resolved by InSAR, ground observations

and elastic modelling, East African Rift, 2007. *Earth and Planetary Science Letters*, **272**, 339-352 (2008).

63. Calais, E. *et al*, Strain accommodation by slow slip and dyking in a youthful continental rift, East Africa. *Nature*, **456**, 783-787 (2008).

64. Biggs, J., Amelung, F., Gourmelen, N., Dixon, T. H., & Kim, S. W. InSAR observations of 2007 Tanzania rifting episode reveal mixed fault and dyke extension in an immature continental rift. *Geophysical Journal International*, **179**, 549-558 (2009).
